# Supplementary material for: [PhSiO1.5]8 promotes self-bromination to produce [o-BrPhSiO1.5]8: further bromination gives crystalline [2,5-Br2PhSiO1.5]8 with a density of 2.32 g cm−3 and a calculated refractive index of 1.7 or the tetraicosa bromo compound [Br3PhSiO1.5]8
Source: Royal Society of Chemistry journal article supplement (doi:10.1039/c1jm11536g), 2011-01-01
Supplement: c1jm11536g.pdf [file c1jm11536g.pdf]

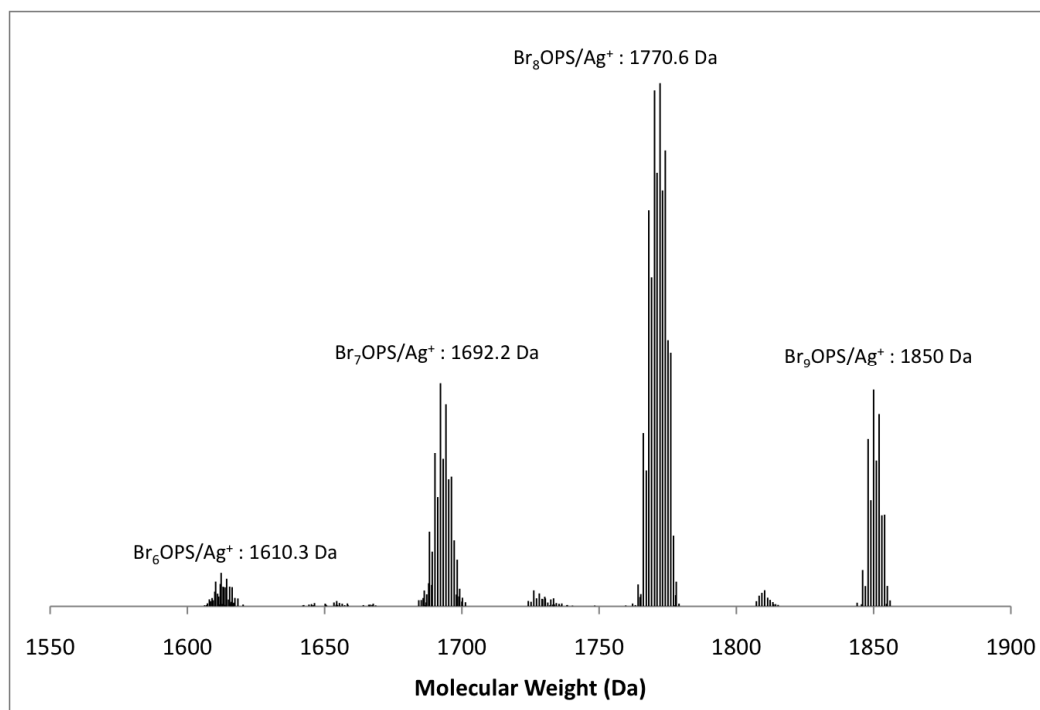

**Figure S.1** MALDI-TOF MS of octa(bromophenyl)silsesquioxane(Ag<sup>+</sup>/Dithranol).

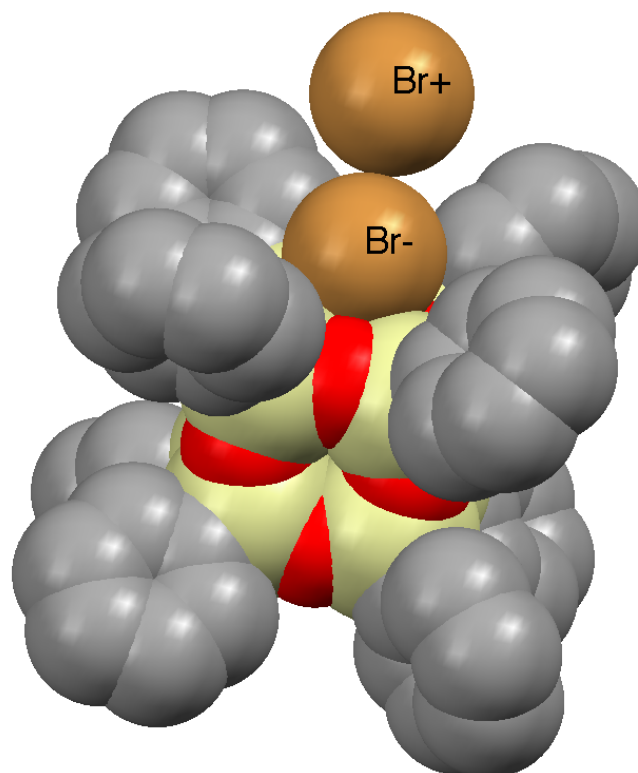

**Figure S.2** Proposed complexation of bromide ion with silsesquioxane cage face.

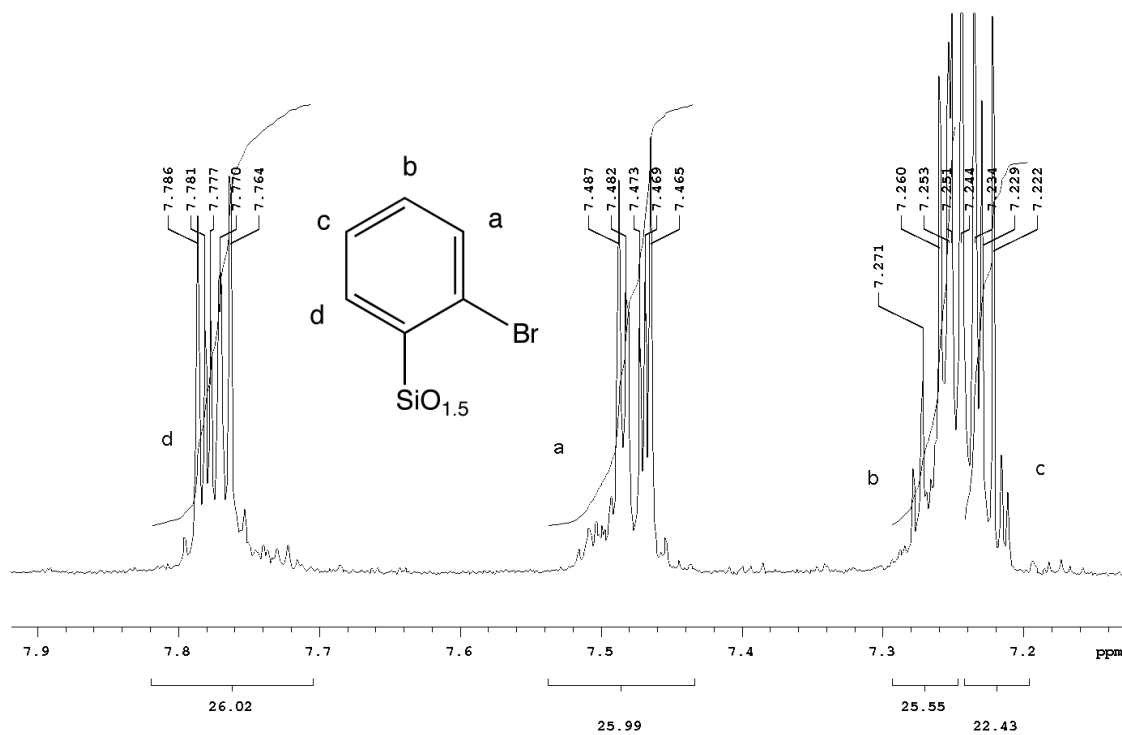

Figure S.3  $^1\text{H}$  NMR spectrum of octa(*o*-bromophenyl)silsesquioxane in  $\text{CS}_2/\text{CDCl}_3$

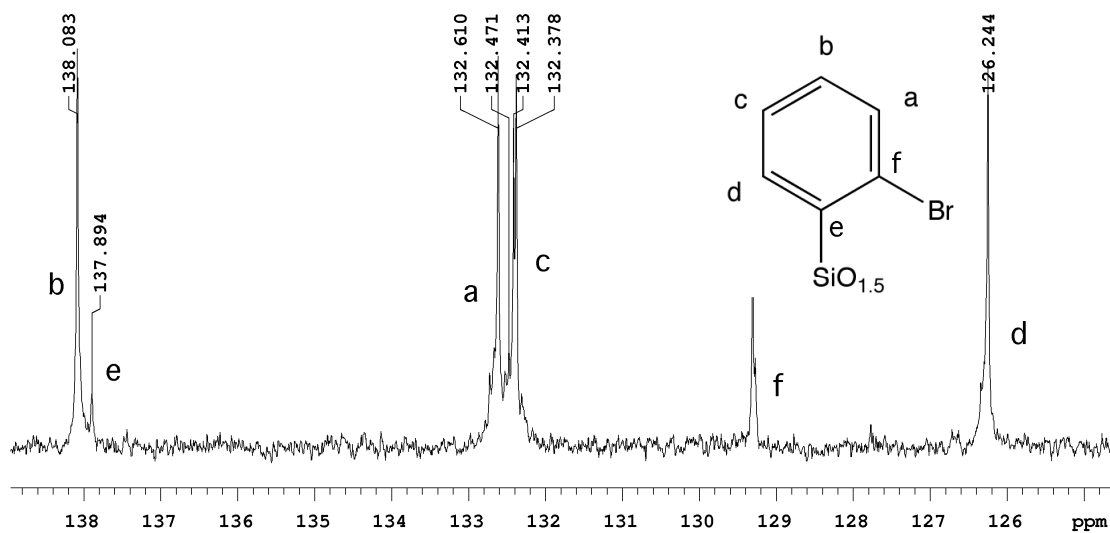

Figure S.4  $^{13}\text{C}$  NMR spectrum of octa(*o*-bromophenyl)silsesquioxane in  $\text{CS}_2/\text{CDCl}_3$ .

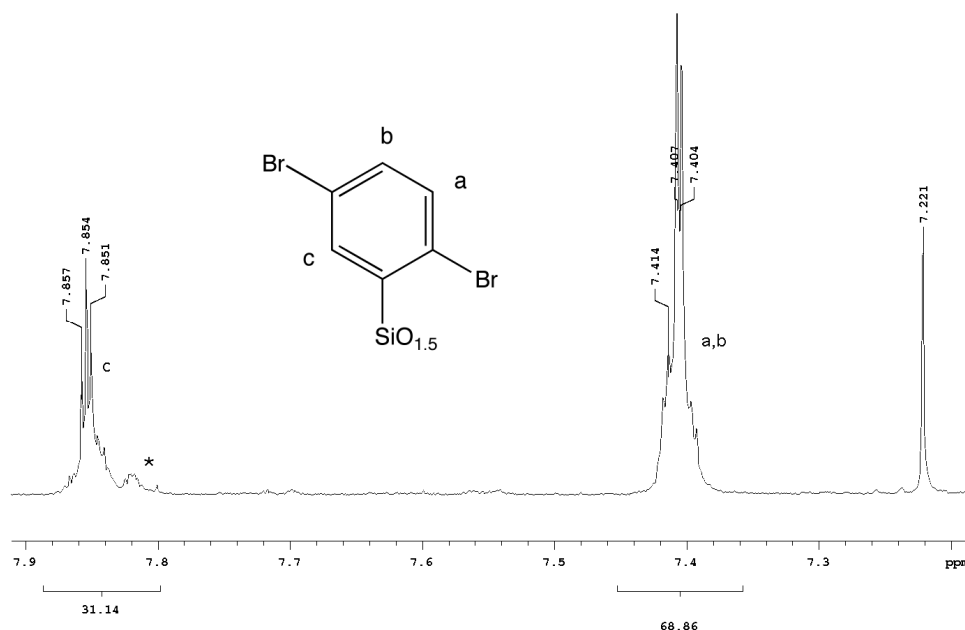

**Figure S.5**  $^1\text{H}$  NMR spectrum of octa(2,5-dibromophenyl)silsesquioxane in  $\text{CS}_2/\text{CDCl}_3$ .

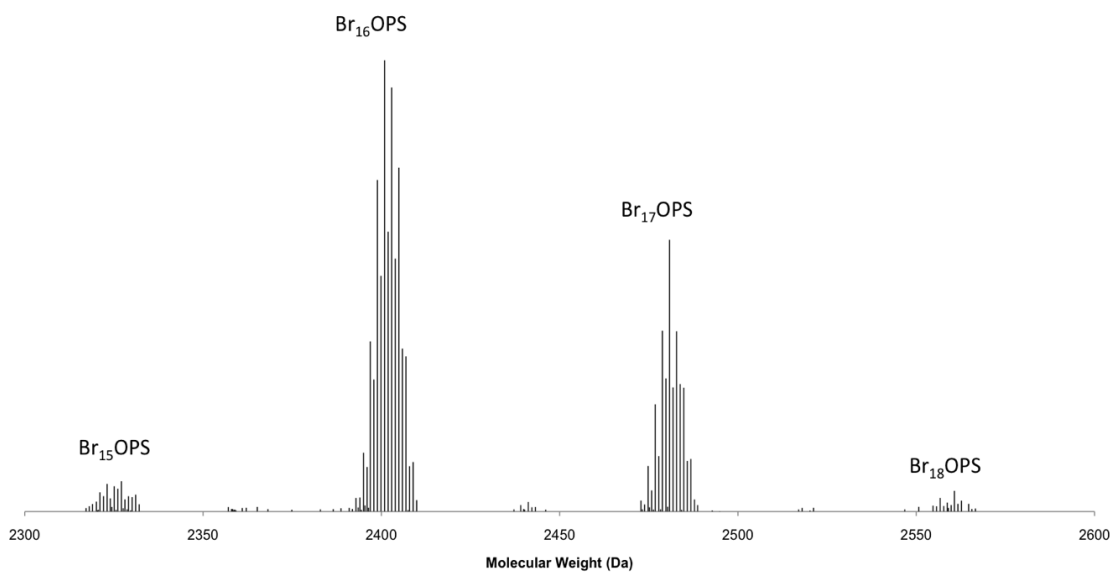

**Figure S.6** MALDI-TOF MS of amorphous  $\text{Br}_{16}\text{OPS}$ . ( $\text{Ag}^+$ /Dithranol).

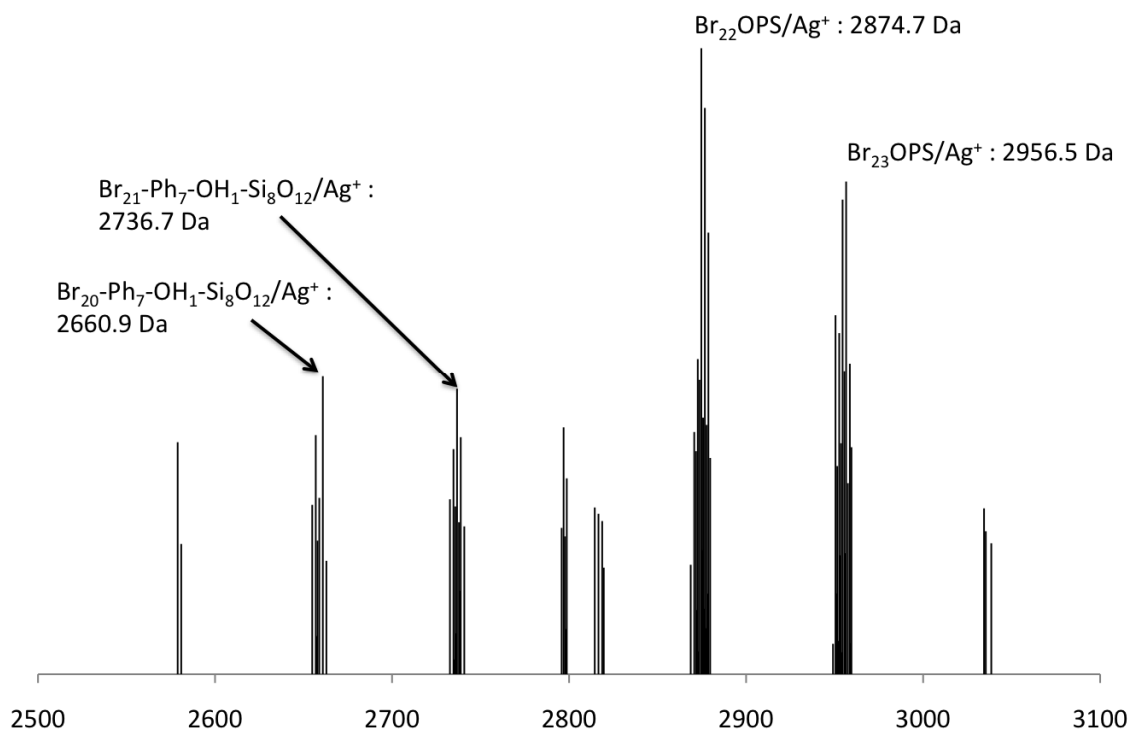

**Figure S.7** MALDI-TOF MS showing corner cleavage during bromination.  
( $\text{Ag}^+$ /Dithranol).

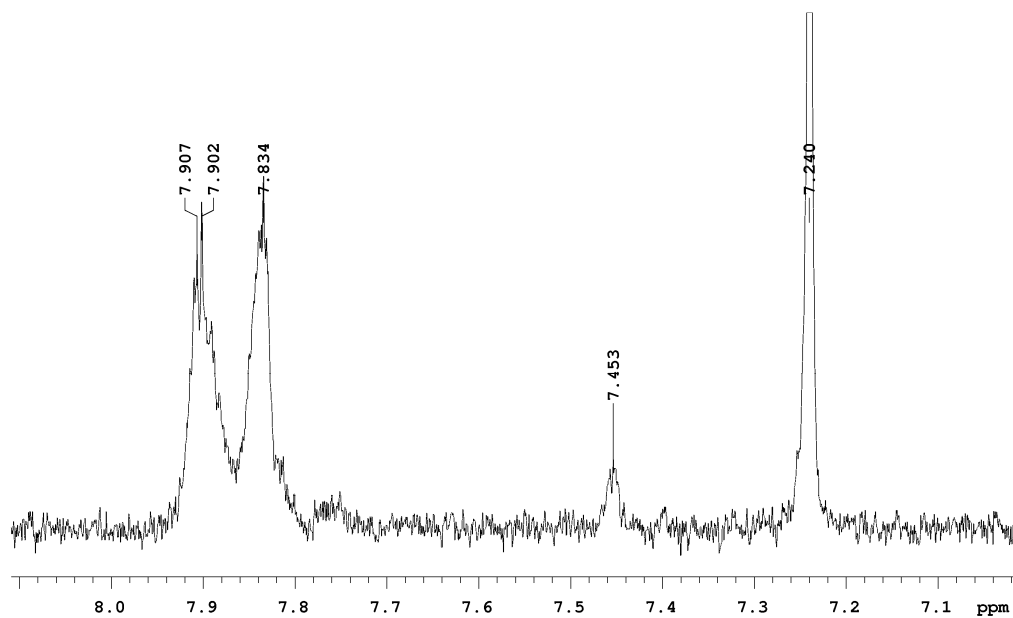

**Figure S.8**  $^1\text{H}$  NMR spectrum of tetraicosabrominated OPS in  $\text{CS}_2/\text{CDCl}_3$

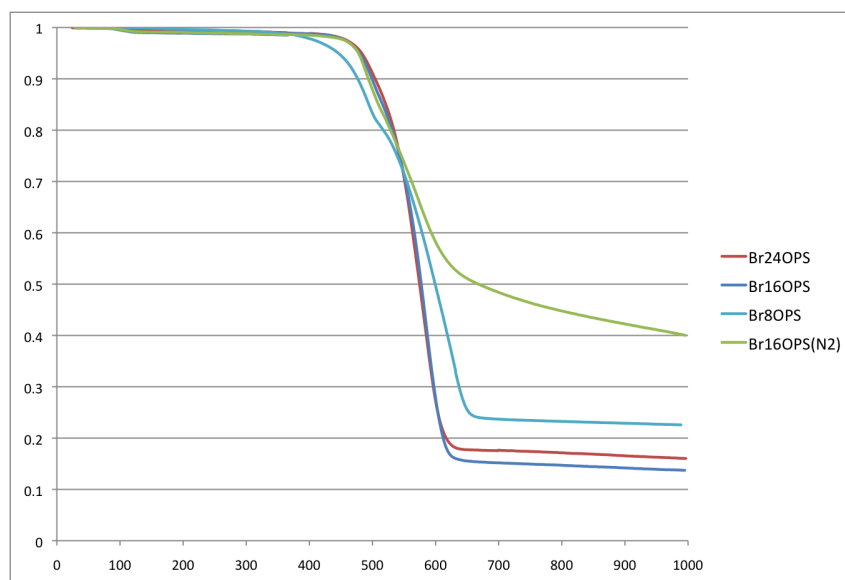

**Figure S.9.** TGAs of brominated OPS derivatives in air. Table 4 lists the ceramic yields.

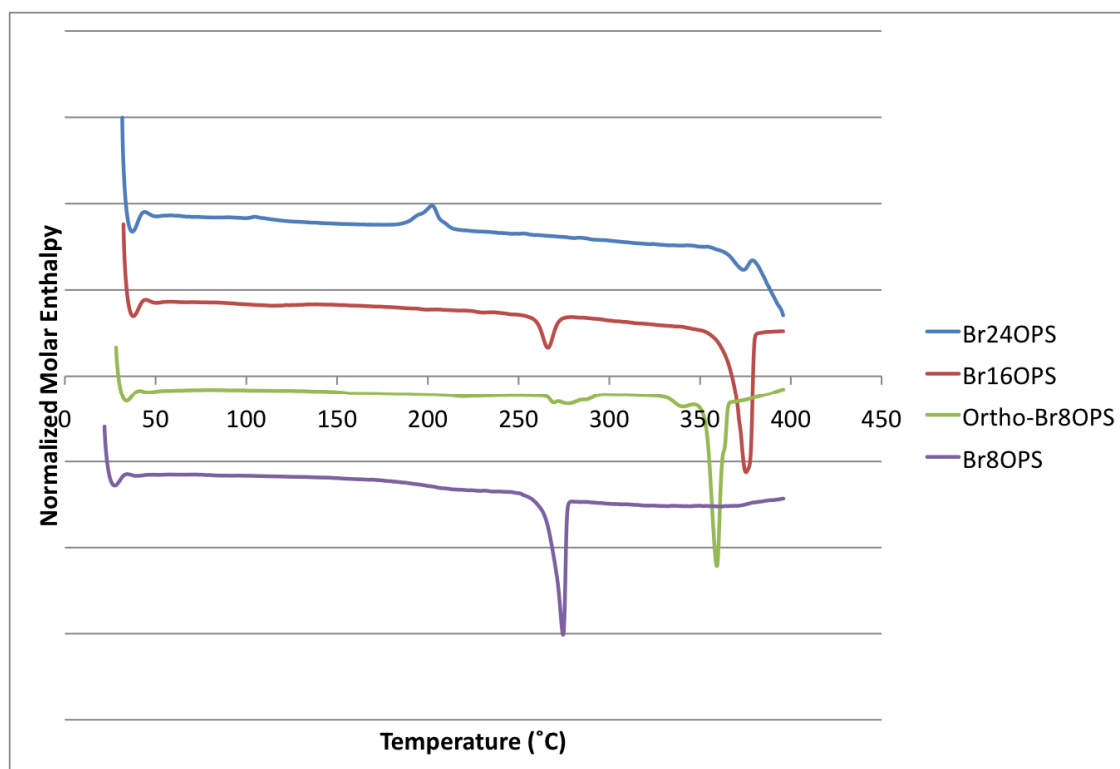

**Figure S.10.** DSC traces of brominated OPS derivatives, showing melting of the crystalline phases.

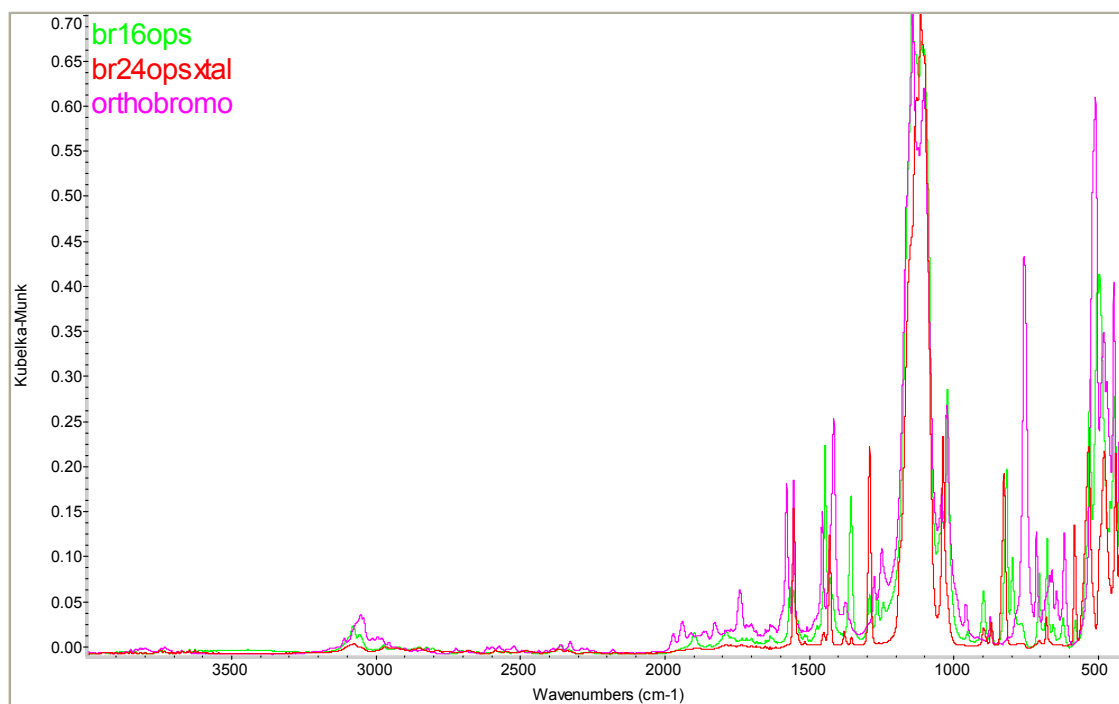

**Figure S.11.** FTIR spectra of brominated OPS derivatives, 3200-400 cm<sup>-1</sup>.

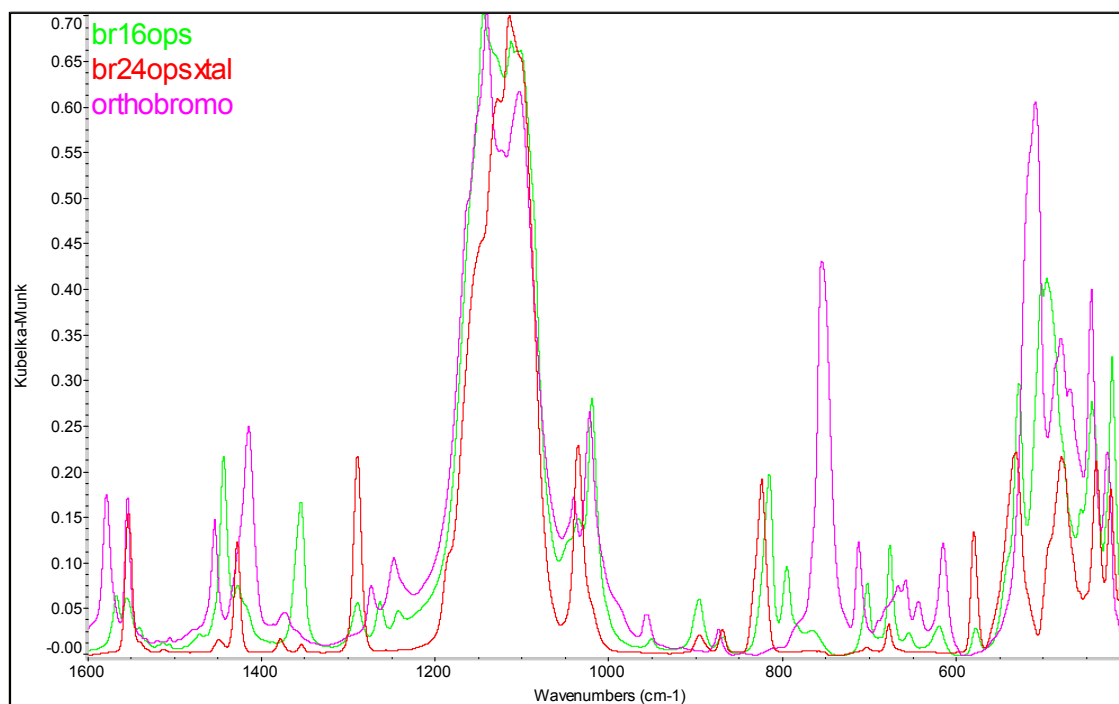

**Figure S.12.** FTIR spectra of brominated OPS derivatives 1600-400 cm<sup>-1</sup>.
